# Supplementary material for: Partitioning between soluble and insoluble fractions of major and trace elements in size-classified airborne particulate matter collected in Tokyo
Source: Royal Society of Chemistry journal article supplement (doi:10.1039/b709937a), 2007-12-06
Supplement: b709937a.pdf [file b709937a.pdf]

Table S1 Total mass concentrations of the elements in the soluble and insoluble fractions of size-classified APM

| Element                      |    | Nov. 2004        |                    |                   | Apl. 2005        |                    |                   | Aug. 2005        |                    |                   | Oct. 2005        |                    |                   |
|------------------------------|----|------------------|--------------------|-------------------|------------------|--------------------|-------------------|------------------|--------------------|-------------------|------------------|--------------------|-------------------|
|                              |    | <2 $\mu\text{m}$ | 2-11 $\mu\text{m}$ | >11 $\mu\text{m}$ | <2 $\mu\text{m}$ | 2-11 $\mu\text{m}$ | >11 $\mu\text{m}$ | <2 $\mu\text{m}$ | 2-11 $\mu\text{m}$ | >11 $\mu\text{m}$ | <2 $\mu\text{m}$ | 2-11 $\mu\text{m}$ | >11 $\mu\text{m}$ |
| Major<br>(wt%)               | Na | 0.490            | 4.79               | 3.43              | 0.811            | 4.47               | 1.65              | 0.699            | 7.97               | 2.45              | 0.610            | 5.73               | 3.47              |
|                              | Mg | 0.103            | 1.26               | 1.21              | 0.345            | 1.30               | 0.797             | 0.225            | 1.41               | 0.939             | 0.169            | 1.30               | 1.22              |
|                              | Al | 0.366            | 2.86               | 3.57              | 1.46             | 3.49               | 3.13              | 0.756            | 1.66               | 6.75              | 0.363            | 2.38               | 4.19              |
|                              | K  | 0.744            | 0.930              | 0.673             | 0.861            | 0.989              | 0.690             | 0.693            | 0.854              | 0.786             | 0.917            | 0.989              | 1.09              |
|                              | Ca | 0.456            | 4.32               | 6.22              | 0.940            | 2.94               | 2.79              | 0.817            | 3.00               | 5.75              | 0.639            | 3.01               | 6.36              |
|                              | Fe | 0.953            | 5.23               | 4.73              | 1.59             | 3.20               | 2.97              | 1.15             | 3.55               | 4.08              | 0.991            | 3.47               | 4.62              |
| Trace<br>( $\mu\text{g/g}$ ) | Li | 8.61             | 14.6               | 12.6              | 11.3             | 17.7               | 10.9              | 5.60             | 6.73               | 10.6              | 9.14             | 14.0               | 8.41              |
|                              | Be | 0.164            | 0.674              | 0.590             | 0.409            | 0.939              | 0.620             | 0.043            | 0.012              | N.D.              | 0.074            | 0.225              | N.D.              |
|                              | Ti | 333              | 2500               | 2620              | 976              | 2190               | 1920              | 696              | 1570               | 2370              | 369              | 2200               | 2550              |
|                              | V  | 108              | 82.5               | 65.1              | 200              | 77.9               | 65.9              | 280              | 82.9               | 60.8              | 147              | 66.8               | 63.7              |
|                              | Cr | 108              | 351                | 417               | 112              | 165                | 149               | 94.2             | 166                | 196               | 63.6             | 175                | 34.3              |
|                              | Mn | 898              | 1200               | 1150              | 690              | 927                | 741               | 477              | 725                | 970               | 1210             | 954                | 1120              |
|                              | Co | 4.82             | 16.0               | 13.9              | 7.14             | 12.3               | 9.82              | 3.40             | 7.96               | 2.47              | 4.53             | 12.9               | 20.8              |
|                              | Ni | 96.3             | 120                | 136               | 122              | 84.5               | 70.5              | 294              | 192                | 17.5              | 81.0             | 46.4               | 34.2              |
|                              | Cu | 399              | 1510               | 762               | 326              | 531                | 217               | 488              | 1000               | 416               | 468              | 1020               | 545               |
|                              | Zn | 6220             | 6890               | 3410              | 3830             | 2860               | 847               | 3370             | 3670               | 1850              | 9110             | 7140               | 2400              |
|                              | As | 69.5             | 31.5               | 7.54              | 74.7             | 38.7               | 10.7              | 68.9             | 23.8               | 12.0              | 107              | 41.8               | 12.2              |
|                              | Se | 62.0             | 11.4               | N.D.              | 53.6             | 5.86               | N.D.              | 52.3             | 13.4               | N.D.              | 66.5             | 11.6               | N.D.              |
|                              | Mo | 75.0             | 112                | 88.2              | 41.6             | 17.7               | 6.25              | 187              | 59.3               | N.D.              | 43.8             | 25.8               | 74.6              |
|                              | Cd | 30.9             | 10.2               | N.D.              | 27.7             | 10.4               | 1.26              | 23.7             | 12.3               | 3.24              | 41.2             | 6.39               | N.D.              |
|                              | Sb | 130              | 233                | 76.2              | 96.0             | 77.7               | 24.9              | 105              | 138                | 7.48              | 160              | 150                | 67.9              |
|                              | Ba | 243              | 1630               | 889               | 294              | 822                | 329               | 566              | 1200               | 761               | 257              | 1250               | 1270              |
|                              | Pb | 1150             | 679                | 291               | 990              | 319                | 103               | 715              | 291                | 184               | 1590             | 564                | 285               |

Table S2 Minimum, maximum, median and mean mass concentrations of the elements in size-classified APM obtained during the long-term monitoring in Tokyo (May, 1995 – December, 2006)

| Element                      | < 2 $\mu\text{m}$ |         |        |       | 2-11 $\mu\text{m}$ |         |        |       | > 11 $\mu\text{m}$ |         |        |       |       |
|------------------------------|-------------------|---------|--------|-------|--------------------|---------|--------|-------|--------------------|---------|--------|-------|-------|
|                              | minimum           | maximum | median | mean  | minimum            | maximum | median | mean  | minimum            | maximum | median | mean  |       |
| Major<br>(wt%)               | Na                | 0.0388  | 3.57   | 0.666 | 0.747              | 1.12    | 19.3   | 4.62  | 4.94               | 0.531   | 5.07   | 1.96  | 2.20  |
|                              | Mg                | 0.0028  | 0.643  | 0.127 | 0.156              | 0.222   | 2.00   | 1.21  | 1.15               | 0.142   | 2.59   | 0.931 | 0.923 |
|                              | Al                | 0.128   | 2.07   | 0.509 | 0.628              | 0.917   | 5.29   | 2.52  | 2.64               | 0.405   | 14.3   | 4.00  | 4.11  |
|                              | K                 | 0.398   | 1.41   | 0.790 | 0.804              | 0.128   | 2.57   | 0.996 | 1.01               | 0.476   | 2.96   | 0.720 | 0.748 |
|                              | Ca                | 0.211   | 2.78   | 0.595 | 0.670              | 1.07    | 6.33   | 3.68  | 3.78               | 0.694   | 15.9   | 5.99  | 6.07  |
|                              | Fe                | 0.434   | 2.50   | 0.932 | 1.00               | 1.33    | 9.28   | 4.16  | 4.10               | 0.714   | 11.2   | 4.11  | 4.19  |
| Trace<br>( $\mu\text{g/g}$ ) | Li                | 1.23    | 47.1   | 8.36  | 9.10               | 1.67    | 41.6   | 13.1  | 14.2               | 0.0073  | 20.1   | 12.0  | 11.5  |
|                              | Be                | 0.0084  | 1.79   | 0.145 | 0.244              | 0.105   | 5.65   | 0.644 | 0.786              | 0.0191  | 4.03   | 0.678 | 0.818 |
|                              | Ti                | 145     | 1540   | 361   | 448                | 461     | 5110   | 1060  | 2190               | 535     | 9600   | 2600  | 2670  |
|                              | V                 | 35.5    | 947    | 172   | 211                | 13.9    | 240    | 100   | 104                | 17.5    | 307    | 94.5  | 97.8  |
|                              | Cr                | 18.6    | 1100   | 96.3  | 112                | 42.2    | 1200   | 263   | 278                | 103     | 3280   | 299   | 352   |
|                              | Mn                | 99.7    | 1200   | 662   | 687                | 104     | 2920   | 1020  | 1030               | 232     | 3030   | 1030  | 1090  |
|                              | Co                | 0.325   | 25.5   | 5.14  | 5.84               | 2.68    | 37.6   | 14.9  | 15.3               | 3.18    | 56.8   | 16.8  | 17.2  |
|                              | Ni                | 23.3    | 1240   | 118   | 141                | 17.8    | 1120   | 122   | 138                | 15.1    | 2730   | 171   | 225   |
|                              | Cu                | 102     | 805    | 426   | 440                | 119     | 2990   | 982   | 1060               | 143     | 1370   | 492   | 515   |
|                              | Zn                | 449     | 10900  | 4450  | 4930               | 246     | 17500  | 3890  | 4240               | 14.4    | 6470   | 2100  | 2180  |
|                              | As                | 31.0    | 129    | 66.6  | 66.8               | 10.7    | 79.3   | 29.8  | 31.2               | 0.80    | 35.5   | 10.3  | 10.6  |
|                              | Se                | 19.9    | 99.9   | 58.4  | 57.4               | 2.28    | 43.9   | 14.0  | 14.5               | 0.193   | 12.4   | 3.30  | 3.61  |
|                              | Mo                | 7.26    | 211    | 67.9  | 72.3               | 1.79    | 376    | 83.4  | 88.2               | 0.28    | 529    | 64.9  | 86.6  |
|                              | Cd                | 11.1    | 103    | 39.0  | 42.4               | 2.00    | 56.2   | 12.2  | 14.4               | 0.0567  | 26.1   | 3.39  | 4.23  |
|                              | Sb                | 38.7    | 459    | 167   | 181                | 15.4    | 461    | 166   | 181                | 5.75    | 146    | 52.4  | 52.6  |
|                              | Ba                | 29.7    | 735    | 209   | 236                | 112     | 2880   | 1010  | 1150               | 67.5    | 2450   | 508   | 583   |
|                              | Pb                | 422     | 5110   | 1260  | 1420               | 141     | 2260   | 566   | 649                | 70.0    | 641    | 259   | 266   |
